# Supplementary material for: Taurine ameliorates hyperglycemia and dyslipidemia by reducing insulin resistance and leptin level in Otsuka Long-Evans Tokushima fatty (OLETF) rats with long-term diabetes
Source: PubMed Central journal article supplement — Exp Mol Med. 2012 Sep 21;44(11):665–73. doi: 10.3858/emm.2012.44.11.075 (PMC3509183; doi:10.3858/emm.2012.44.11.075), 2012-09-21
Supplement: emm-44-665-s001.pdf [file emm-44-665-s001.pdf]

**Supplemental Data Table S1.** Composition of experimental diets in rats (g/100g diet)

| Ingredients                   | Experimental diets |              |
|-------------------------------|--------------------|--------------|
|                               | Normal diet        | Taurine diet |
| Casein                        | 20                 | 20           |
| Corn starch                   | 15                 | 15           |
| Sucrose                       | 50                 | 50           |
| Cellulose                     | 5                  | 5            |
| Corn oil                      | 5                  | 5            |
| Mineral mixture <sup>1)</sup> | 3.5                | 3.5          |
| Vitamin mixture <sup>2)</sup> | 1                  | 1            |
| DL-Methionine                 | 0.3                | 0.3          |
| Choline bitartrate            | 0.2                | 0.2          |
| Taurine                       | 0                  | 2            |

<sup>1)</sup>AIN-76 Mineral Mixture (g/kg): Calcium phosphate dibasic 500g, Sodium chloride 74g, Potassium citrate monohydrate 220g, Potassium sulfate 52g, Magnesium oxide 24g, Manganous carbonate (43~48%Mn) 3.5g, Ferric citrate (16~17%Fe) 6g, Zinc carbonate

(70% ZnO) 1.6g, Cupric carbonate (53~55% Cu) 0.3g, Potassium iodate 0.01g, Sodium selenite 0.01g, Chromium potassium sulfate 0.55g, Sucrose (finely powdered) 118.03g.

<sup>2)</sup>AIN-76 Vitamin Mixture (g/kg): Thiamin hydrochloride 0.6g, Riboflavin 0.6g, Pyridoxine hydrochloride 0.7g, Niacin 3g, Calcium pantothenate 1.6g, Folic acid 0.2g, Biotin 0.02g, Vitamine B<sub>12</sub>(0.1%) 1g, Vitamin A palmitate (500,000IU/g) 0.8g, Vitamin E acetate (500IU/g) 10g, Vitamin D<sub>3</sub> (400,000IU/g) 0.25g, Menadione sodium bisulfite 0.08 g, Sucrose (finely powdered) 981.15g.
